# Supplementary material
Source: MDPI journal article supplement (https://www.mdpi.com/2075-163X/7/9/171)
Supplement: s1 [file s1]

## Sheet: Sample 104793
No.	Analytical spot	Notes	206Pb/204Pb	Pb ppm	Th ppm	U ppm	U/Th	207Pb/206Pb	1s	206Pbc (%)	207Pb/235U	1s	206Pb/238U	1s	r	Concordance %	207Pb/206Pb age Ma	1s	207Pb/235U age Ma	1s	206Pb/238U age Ma	1s
9945	104793C2.1	spongy core	155327	92829.8	1162.76	475163	408.652	0.115403	0.000509697	0.0110826	3.92394	0.089276	0.246606	0.005629	0.981224	75.287	1886.19	7.93041	1618.63	18.245	1420.95	29.043
9946	104793C2.2	spongy core	155486	83355.8	579.797	429268	740.376	0.115703	0.00051101	0.0110713	3.91086	0.0889794	0.245146	0.00559568	0.981226	74.702	1890.86	7.92578	1615.93	18.233	1413.39	28.9052
9947	104793C2.3	smooth rim	167737	145160	1812.61	711513	392.534	0.112979	0.000498194	0.0102627	4.02068	0.0914732	0.258106	0.00589144	0.981283	80.0502	1847.88	7.95436	1638.39	18.3331	1480.15	30.1167
9948	104793C2.4	smooth rim	206603	144321	14117.5	705317	49.9603	0.116455	0.000513423	0.00833205	4.11987	0.0937299	0.256581	0.00585662	0.98129	77.3531	1902.51	7.90088	1658.25	18.4206	1472.33	29.9754
9949	104793C2.5	spongy core	178018	105820	1685.82	489930	290.617	0.115054	0.000507286	0.00966996	4.32613	0.0984253	0.272706	0.00622474	0.981288	82.6095	1880.73	7.92205	1698.35	18.5927	1554.52	31.4522
9951	104793C2.7	smooth rim	166628	136976	12045.5	650327	53.9891	0.116719	0.000514581	0.010331	4.25241	0.0967459	0.264236	0.0060314	0.981291	79.2318	1906.58	7.89694	1684.2	18.5325	1511.48	30.6813
9952	104793C2.8	smooth rim	160797	130884	12992.2	636527	48.9932	0.117576	0.000518338	0.0107056	4.17454	0.0949744	0.257505	0.00587778	0.981293	76.8977	1919.71	7.88429	1669.04	18.4676	1477.07	30.0614
9953	104793C2.9	spongy core	169905	112164	915.01	559384	611.343	0.114931	0.000506744	0.0101317	4.01533	0.0913539	0.253387	0.00578378	0.981288	77.4471	1878.8	7.92394	1637.31	18.3287	1455.92	29.6787
9954	104793C2.10	spongy core	164303	103206	765.613	521517	681.175	0.111258	0.000490651	0.0104772	3.84895	0.0875695	0.250906	0.00572716	0.981281	79.2395	1820.06	7.9821	1603.05	18.1737	1443.15	29.447
9955	104793C2.11	smooth rim	171545	138944	10576.3	682980	64.5766	0.114491	0.000504819	0.0100349	4.04213	0.0919621	0.256057	0.00584466	0.981287	78.4651	1871.89	7.9307	1642.72	18.3524	1469.64	29.9268
9956	104793C2.12	smooth rim	181962	130843	16519.3	631271	38.2142	0.117086	0.000516189	0.00946039	4.18817	0.0952849	0.259428	0.00592167	0.981292	77.7187	1912.21	7.8915	1671.71	18.4792	1486.92	30.2392
9961	104793C2.13	spongy core	141946	149593	123.363	399583	3239.09	0.124426	0.00054836	0.0121274	8.0468	0.183071	0.46904	0.0107062	0.981305	122.631	2020.65	7.78941	2236.29	20.3422	2479.35	46.8105
9962	104793C2.14	spongy core	142418	177686	145.418	485209	3336.65	0.125787	0.000554325	0.0120872	7.94837	0.18083	0.458291	0.0104608	0.981307	119.156	2039.9	7.77178	2225.18	20.3144	2432.01	46.0773
9963	104793C2.15	smooth rim	175156	123332	37.6112	630297	16758.2	0.115413	0.000508858	0.00982799	3.93689	0.089569	0.247398	0.00564709	0.981289	75.5033	1886.34	7.91657	1621.3	18.2568	1425.04	29.1177
9964	104793C2.16	smooth rim	165531	131475	293.058	662587	2260.95	0.113668	0.000501213	0.0103995	3.93816	0.0895975	0.251277	0.00573561	0.981285	77.6906	1858.87	7.9435	1621.56	18.2579	1445.06	29.4816
9965	104793C2.17	smooth rim	188701	116642	154.961	594208	3834.56	0.113848	0.000502002	0.00912253	3.90206	0.0887773	0.24858	0.00567406	0.981286	76.8306	1861.73	7.94069	1614.11	18.2243	1431.15	29.2288
9966	104793C2.18	smooth rim	191124	100795	224.153	473764	2113.57	0.11803	0.000521188	0.00900688	4.36774	0.0993736	0.268389	0.00612619	0.981232	79.5117	1926.61	7.89071	1706.26	18.626	1532.62	31.0606
9967	104793C2.19	spongy core	146271	173464	153.371	400588	2611.88	0.124499	0.000548679	0.0117687	9.31396	0.211899	0.542584	0.0123849	0.981305	138.137	2021.68	7.78846	2369.39	20.6495	2794.26	51.5496
9968	104793C2.20	spongy core	166924	93138.5	57.1458	171903	3008.14	0.127251	0.000565001	0.0103126	9.06923	0.20638	0.516903	0.0117993	0.981029	130.309	2060.33	7.81196	2345.01	20.6009	2686.03	49.9498
9969	104793C2.21	spongy core	146989	128802	116.559	302012	2591.08	0.12859	0.000568374	0.0117113	8.91657	0.202878	0.502909	0.0114795	0.981197	126.273	2078.79	7.76058	2329.5	20.5636	2626.28	49.0518
9970	104793C2.22	spongy core	148031	161462	70.9211	463003	6528.43	0.12659	0.000557848	0.0116288	7.61505	0.173249	0.436286	0.00995855	0.981308	113.73	2051.15	7.76155	2186.64	20.2168	2333.99	44.5422
9976	104793C3.1	spongy core	148002	59558.5	176.804	255442	1444.77	0.117429	0.000519617	0.0116311	4.76634	0.108452	0.29438	0.00671958	0.981156	86.6941	1917.46	7.91569	1778.99	18.9197	1663.38	33.379
9977	104793C3.2	spongy core	166570	65907.4	539.832	339068	628.1	0.115459	0.000512286	0.0103345	3.72593	0.0847881	0.234048	0.00534257	0.981055	71.799	1887.06	7.96591	1576.96	18.0555	1355.68	27.8482
9978	104793C3.3	smooth rim	167451	76311.4	282.303	361226	1279.57	0.109009	0.000481734	0.0102802	4.04018	0.0919261	0.268805	0.00613577	0.981204	86.0216	1782.92	8.03518	1642.32	18.3524	1534.73	31.0988
9979	104793C3.4	smooth rim	174127	119542	3273.25	614007	187.583	0.110872	0.000489881	0.00988605	3.77526	0.0858938	0.246958	0.00563704	0.981209	78.3943	1813.76	8.00339	1587.5	18.1016	1422.77	29.0762
9984	104793C3.6	smooth rim	183580	116627	10533.8	596743	56.6502	0.112916	0.00049882	0.00937698	3.83757	0.087312	0.246489	0.00562634	0.981217	76.8621	1846.87	7.96974	1600.66	18.163	1420.34	29.032
9986	104793C3.7	smooth rim	175002	121982	7337.18	617929	84.219	0.119864	0.000529211	0.0098366	4.09547	0.0931793	0.247808	0.00565645	0.981238	72.9943	1954.19	7.86402	1653.4	18.4002	1427.16	29.1563
9987	104793C3.8	smooth rim	195483	117893	2059.94	586257	284.599	0.111181	0.00049123	0.00880602	3.91241	0.0890151	0.25522	0.00582561	0.981211	80.5217	1818.8	7.99824	1616.25	18.2345	1465.34	29.8493
9988	104793C3.9	smooth rim	161200	113958	4072.81	583656	143.305	0.112686	0.000497813	0.0106788	3.84057	0.0873809	0.247186	0.00564225	0.981216	77.2052	1843.18	7.97346	1601.29	18.166	1423.95	29.0977
9989	104793C3.10	spongy core	189916	100277	260.543	488184	1873.72	0.113079	0.000499531	0.00906417	4.06245	0.0924304	0.260559	0.00594748	0.981217	80.6656	1849.48	7.96712	1646.8	18.3717	1492.7	30.3435
9991	104793C3.11	spongy core	151724	120783	4114.62	616289	149.78	0.116571	0.000514806	0.0113458	3.97554	0.0904512	0.247345	0.00564587	0.981228	74.7716	1904.3	7.91253	1629.22	18.293	1424.77	29.1127
9990	104793C3.12	smooth rim	181653	107281	55.108	519591	9428.59	0.115786	0.000511371	0.00947649	4.17246	0.0949328	0.261358	0.00596572	0.981226	79.063	1892.15	7.92452	1668.63	18.4669	1496.79	30.4171
9992	104793C3.13	smooth rim	178032	108835	677.678	557245	822.286	0.112774	0.000498198	0.00966922	3.85262	0.0876559	0.247768	0.00565554	0.981216	77.3139	1844.59	7.97204	1603.82	18.1778	1426.96	29.1525
9993	104793C3.14	smooth rim	176971	118946	1678.25	627327	373.798	0.116744	0.000515562	0.0097272	3.85659	0.0877451	0.239589	0.00546885	0.981229	72.5669	1906.96	7.90992	1604.65	18.1814	1384.56	28.3779
9994	104793C3.15	smooth rim	168630	120134	1518.81	619613	407.959	0.11577	0.000511302	0.0102083	3.9149	0.0890719	0.245258	0.00559823	0.981226	74.6953	1891.9	7.92476	1616.76	18.2369	1413.97	28.9158
9999	104793C6.1	spongy core	145274	125057	170.91	542790	3175.89	0.116587	0.000514877	0.0118495	4.68426	0.106577	0.291399	0.00665147	0.981228	86.5002	1904.55	7.91228	1764.43	18.8616	1648.52	33.1176
10000	104793C6.2	spongy core	137620	145140	443.988	761059	1714.14	0.121353	0.000540921	0.0125086	4.02698	0.0916557	0.240673	0.0054939	0.980884	70.3029	1976.21	7.91874	1639.66	18.3465	1390.2	28.4827
10001	104793C6.3	smooth rim	173630	92563.2	2054.6	434474	211.464	0.115302	0.000511604	0.00991433	4.0641	0.092482	0.255637	0.00583532	0.981054	77.8226	1884.61	7.96845	1647.13	18.3759	1467.48	29.889
10002	104793C6.4	smooth rim	162010	129255	4170.4	648919	155.601	0.112487	0.00049694	0.0106254	3.91503	0.0890758	0.252426	0.00576184	0.981215	78.8077	1839.97	7.9767	1616.79	18.2371	1450.97	29.589
10003	104793C6.5	spongy core	180362	108112	232.124	587390	2530.5	0.114555	0.000505988	0.00954429	3.68526	0.0838492	0.23332	0.00532576	0.981222	72.1412	1872.9	7.94363	1568.18	18.011	1351.88	27.7772
10004	104793C6.6	spongy core	145691	64346.1	128.515	295639	2300.43	0.121268	0.000536382	0.0118156	4.58494	0.104326	0.274211	0.00625925	0.981172	79.0505	1974.97	7.85908	1746.53	18.7922	1562.14	31.5889
10005	104793C6.7	smooth rim	188396	70310.6	177.961	345821	1943.25	0.115499	0.00051119	0.00913728	4.10081	0.0933096	0.257509	0.00587794	0.981147	78.2085	1887.67	7.94562	1654.47	18.4066	1477.08	30.0621
10006	104793C6.8	smooth rim	167126	133478	4642.53	641457	138.17	0.113679	0.000502156	0.0103002	4.12958	0.0939576	0.263466	0.00601383	0.981219	81.0434	1859.05	7.95749	1660.18	18.4303	1507.55	30.6108

## Sheet: Sample 24041365
No.	Analytical spot	Notes	206Pb/204Pb	Pb ppm	Th ppm	U ppm	U/Th	207Pb/206Pb	1s	206Pbc (%)	207Pb/235U	1s	206Pb/238U	1s	r	Concordance %	207Pb/206Pb age Ma	1s	207Pb/235U age Ma	1s	206Pb/238U age Ma	1s
9834	24041365 C1gr1.1		161286	168896	119.863	848962	7082.75	0.124268	0.000870104	0.0106732	4.3679	0.0948919	0.254926	0.00590847	0.953411	72.4887	2018.39	12.3596	1706.29	17.7928	1463.83	30.2799
9835	24041365 C1gr1.2		148476	175337	102.539	830011	8094.62	0.115989	0.000811786	0.011594	4.34586	0.0944125	0.271742	0.0062982	0.953454	81.7089	1895.3	12.5336	1702.11	17.776	1549.64	31.8466
9836	24041365 C1gr1.3		140848	167338	134.584	831587	6178.92	0.120785	0.000845802	0.0122219	4.30022	0.0934213	0.258212	0.00598463	0.953402	75.1976	1967.85	12.4333	1693.4	17.7412	1480.69	30.5894
9838	24041365 C1gr2.2		153171	168024	9.05458	850746	93957.5	0.121013	0.000847391	0.0112386	4.24397	0.0921996	0.254355	0.00589523	0.953403	74.0699	1971.21	12.4284	1682.57	17.6974	1460.89	30.226
9839	24041365 C1gr2.3		140719	182969	10.2289	871372	85187.4	0.115124	0.000805746	0.0122331	4.32342	0.0939256	0.27237	0.00631276	0.953452	82.459	1881.83	12.554	1697.84	17.759	1552.82	31.9043
9840	24041365 C1gr3.1		165908	180329	5.56167	823806	148122	0.118539	0.000830131	0.0103758	4.63544	0.100704	0.283614	0.00657335	0.953395	83.1638	1934.32	12.4832	1755.67	17.9845	1609.54	32.9277
9841	24041365 C1gr3.2		134838	177209	6.38118	865237	135592	0.118631	0.000830768	0.0127666	4.34812	0.0944628	0.26583	0.00616118	0.953395	78.4511	1935.7	12.4811	1702.54	17.778	1519.6	31.3006
9842	24041365 C1gr3.3	random spots in	146385	174312	7.3506	883408	120182	0.115678	0.000810167	0.0117596	4.10358	0.0891505	0.257283	0.0059631	0.953386	78.0202	1890.47	12.5494	1655.02	17.5838	1475.93	30.5021
9843	24041365 C1gr4.1	breccia fragments	140634	172889	300.695	795298	2644.86	0.115334	0.000807768	0.0122405	4.51687	0.0981295	0.284039	0.00658327	0.953386	85.4353	1885.11	12.5576	1734.08	17.9021	1611.67	32.9663
9844	24041365 C1gr4.2		125715	159853	651.79	820787	1259.28	0.114763	0.000803781	0.0136931	4.03576	0.0876781	0.255049	0.00591132	0.953383	77.9947	1876.16	12.5713	1641.43	17.5268	1464.46	30.2915
9845	24041365 C1gr5.1		147891	174020	915.048	802643	877.16	0.116389	0.000815128	0.0116399	4.5582	0.099028	0.28404	0.0065833	0.953389	84.7041	1901.49	12.5327	1741.66	17.9314	1611.68	32.9665
9846	24041365 C1gr5.2		149770	158906	877.85	870574	991.712	0.11494	0.000805018	0.0114938	3.80184	0.0825966	0.239895	0.00556012	0.953384	73.7245	1878.94	12.5671	1593.14	17.3171	1386.15	28.8433
9847	24041365 C1gr6.1		117355	168801	137.383	795866	5793.05	0.119496	0.000836806	0.0146685	4.58388	0.0995863	0.278214	0.00644826	0.953399	81.1393	1948.7	12.4617	1746.34	17.9494	1582.36	32.4388
9849	24041365 C1gr7.1		145877	164484	11.9778	756700	63175	0.119638	0.000837799	0.0118006	4.72157	0.102579	0.28623	0.00663405	0.953399	83.1276	1950.82	12.4586	1771.07	18.0429	1622.66	33.1635
9850	24041365 C1gr7.2		131575	167200	19.5283	763045	39073.8	0.118948	0.000832984	0.0130833	4.74397	0.103065	0.289256	0.00670419	0.953397	84.3444	1940.48	12.474	1775.04	18.0577	1637.81	33.4348
9851	24041365 C1gr8.1		166562	164118	951.401	692017	727.367	0.1209	0.000846603	0.0103351	5.21796	0.113363	0.313021	0.00725497	0.953402	89.0888	1969.54	12.4308	1855.55	18.3454	1755.56	35.521
9852	24041365 C1gr8.2		143865	150026	958.222	771547	805.186	0.119827	0.000839116	0.0119656	4.25258	0.0923907	0.257393	0.00596572	0.9534	75.5298	1953.64	12.4544	1684.23	17.7049	1476.49	30.5128
9853	24041365 C1gr8.3		143271	141638	530.747	631554	1189.93	0.119657	0.000838582	0.0120152	4.83776	0.10511	0.293229	0.00679633	0.953323	84.9068	1951.1	12.4679	1791.49	18.1195	1657.64	33.7893

## Sheet: Sample 24041367
No.	Analytical spot	Notes	206Pb/204Pb	Pb ppm	Th ppm	U ppm	U/Th	207Pb/206Pb	1s	206Pbc (%)	207Pb/235U	1s	206Pb/238U	1s	r	Concordance %	207Pb/206Pb age Ma	1s	207Pb/235U age Ma	1s	206Pb/238U age Ma	1s
9880	24041367C1.gr1.6		49719	128240	4754.36	527664	110.985	0.11732	0.000452815	0.0346232	4.88221	0.122007	0.301817	0.00725124	0.988369	88.5858	1915.79	6.90821	1799.19	20.8453	1700.31	35.8075
9881	24041367C1.gr1.7	breccia fragment,	65432.6	89618.9	3610.71	375178	103.907	0.126007	0.000489468	0.0263084	4.88997	0.122216	0.281455	0.00676221	0.988215	78.1594	2042.99	6.85019	1800.53	20.8535	1598.69	33.9281
9882	24041367C1.gr1.8	traverse between	80776.6	120359	4490.49	557809	124.22	0.120284	0.000464173	0.021311	4.45517	0.111335	0.268629	0.00645393	0.988374	78.1548	1960.44	6.87069	1722.66	20.5145	1533.84	32.7119
9883	24041367C1.gr1.9	gold bearing	82229.9	120100	4616.6	556442	120.531	0.119127	0.00045974	0.0209343	4.42824	0.110663	0.2696	0.00647725	0.988372	79.1022	1943.17	6.88513	1717.64	20.4919	1538.77	32.8047
9884	24041367C1.gr1.10	fractures	69041.3	127314	4793.73	588884	122.845	0.121647	0.00046939	0.0249333	4.52946	0.113192	0.270051	0.00648807	0.988376	77.7152	1980.52	6.85402	1736.4	20.5757	1541.06	32.8478
9885	24041367C1.gr1.11		94125.9	133305	4515.71	555585	123.034	0.120208	0.00046388	0.0182886	4.98606	0.124602	0.300831	0.00722756	0.988374	86.4514	1959.31	6.87164	1816.96	20.9186	1695.43	35.7179
9886	24041367C1.gr1.12		22270.7	75981.9	3766.99	454600	120.68	0.117447	0.000456881	0.0772955	3.2373	0.0809154	0.199912	0.00480315	0.988181	61.0089	1917.73	6.96096	1466.14	19.2069	1174.85	25.7529
9887	24041367C1.gr1.13	breccia fragment,	57089.9	130596	3461.98	562339	162.433	0.116694	0.000450421	0.0301529	4.72255	0.118018	0.293511	0.0070517	0.988368	86.8902	1906.2	6.9164	1771.25	20.7275	1659.05	35.0478
9888	24041367C1.gr1.14	traverse between	63664.1	99849.5	2709	422082	155.807	0.123831	0.000478696	0.0270392	5.08439	0.127063	0.297789	0.00715448	0.988331	83.4032	2012.14	6.84144	1833.5	20.9862	1680.34	35.4403
9889	24041367C1.gr1.15	gold bearing	70221.2	141042	4273.72	618522	144.727	0.119269	0.000461257	0.0245144	4.64186	0.116005	0.282269	0.0067816	0.988321	82.2871	1945.3	6.89786	1756.83	20.666	1602.78	34.0037
9890	24041367C1.gr1.16	fractures	43680	132767	4576.34	601147	131.36	0.116952	0.000451407	0.03941	4.52755	0.113145	0.280771	0.00674563	0.988369	83.334	1910.16	6.91299	1736.05	20.5743	1595.25	33.8632
9891	24041367C1.gr1.17		81643.3	134646	5804.62	602701	103.831	0.119536	0.000461306	0.0210847	4.6799	0.116952	0.283947	0.00682192	0.988373	82.5658	1949.3	6.88	1763.65	20.695	1611.21	34.1607
9892	24041367C1.gr1.18		61269.9	106915	2108.76	462457	219.303	0.120382	0.000464544	0.0280958	4.89277	0.122274	0.294777	0.00708211	0.988375	84.7644	1961.89	6.86946	1801.01	20.8534	1665.36	35.1642
9893	24041367C1.gr1.19		69178.7	109529	2495.82	503853	201.879	0.117836	0.000454794	0.0248838	4.5232	0.113038	0.278398	0.00668862	0.988371	82.1962	1923.66	6.90157	1735.25	20.5711	1583.29	33.6399
9894	24041367C1.gr1.20		48548	93201.5	6464.87	422002	65.2762	0.118204	0.000457181	0.0354583	4.63709	0.115887	0.28452	0.00683577	0.988319	83.5065	1929.24	6.9116	1755.97	20.6625	1614.09	34.2146
9895	24041367C1.gr1.21		71766.1	91730.4	5632.04	410667	72.9162	0.123424	0.000477142	0.0239866	4.84853	0.12117	0.28491	0.00684506	0.988331	80.4561	2006.31	6.84631	1793.36	20.8218	1616.04	34.2506
9896	24041367C1.gr1.22		53746.2	101179	5860.14	431203	73.5823	0.11676	0.000451665	0.0320288	4.85966	0.121448	0.301864	0.00725243	0.988315	89.0074	1907.2	6.93074	1795.29	20.8298	1700.54	35.8121
9897	24041367C1.gr1.23		97774.4	104142	7129.01	474407	66.546	0.118673	0.00045898	0.0176061	4.62302	0.115534	0.282536	0.00678802	0.98832	82.7661	1936.34	6.90559	1753.43	20.6512	1604.12	34.0287
9915	24041367C2.gr1.1		30736.8	172133	624.344	808390	1294.78	0.116693	0.000514455	0.0560054	4.30953	0.0980424	0.267846	0.00611375	0.981291	80.0121	1906.17	7.89719	1695.19	18.5784	1529.86	31.0109
9916	24041367C2.gr1.2		58478	170765	992.985	833282	839.168	0.11553	0.000509365	0.0294372	4.11408	0.0935959	0.258272	0.00589522	0.981289	78.3057	1888.16	7.91474	1657.1	18.4152	1481	30.132
9917	24041367C2.gr1.3	random spots in	43857.7	170425	121.644	798299	6562.56	0.116093	0.000511832	0.0392503	4.30452	0.0979285	0.268916	0.00613817	0.98129	80.7598	1896.91	7.9062	1694.23	18.5744	1535.3	31.1083
9919	24041367C2.gr1.4	breccia fragments	90015.8	179709	81.4747	825171	10127.9	0.117551	0.000517549	0.0191236	4.4441	0.101104	0.274193	0.00625863	0.981341	81.3017	1919.32	7.87441	1720.6	18.684	1562.05	31.5862
9918	24041367C2.gr1.5	without gold bearing	75717.7	173050	83.6896	818910	9785.09	0.116692	0.000514461	0.0227348	4.28362	0.0974529	0.266236	0.006077	0.981291	79.7289	1906.17	7.8973	1690.22	18.5575	1521.67	30.864
9920	24041367C2.gr1.6	fractures	45196.8	162270	90.4175	804184	8894.12	0.109389	0.000481739	0.0380874	3.85801	0.087771	0.255792	0.00583861	0.981332	81.8568	1789.27	8.00112	1604.94	18.1814	1468.28	29.9022
9921	24041367C2.gr2.1		21106.8	173159	228.701	854641	3736.93	0.114321	0.000504057	0.0815581	4.06456	0.0924712	0.257862	0.00588586	0.981287	78.7469	1869.21	7.93309	1647.22	18.3721	1478.89	30.0941
9922	24041367C2.gr2.2		17394.6	160057	177.054	830377	4689.95	0.116347	0.00051293	0.0989635	3.88689	0.0884278	0.242296	0.00553057	0.981291	73.1798	1900.84	7.90221	1610.96	18.209	1398.62	28.6351
9923	24041367C2.gr2.3		13216.1	184735	186.303	727535	3905.12	0.12156	0.000535773	0.130252	5.31942	0.121017	0.317375	0.00724431	0.981301	89.2031	1979.24	7.8275	1871.99	19.2608	1776.9	35.352
9924	24041367C2.gr2.4		54474.7	176318	26.1411	788069	30146.8	0.120154	0.000529631	0.0316005	4.65515	0.105905	0.280991	0.00641379	0.981297	81.3772	1958.51	7.84727	1759.22	18.8394	1596.35	32.196
9925	24041367C2.gr2.5		44872.2	161326	35.2991	851680	24127.5	0.11671	0.000514536	0.0383629	3.83921	0.0873431	0.238578	0.00544571	0.981291	72.1975	1906.44	7.89698	1601.01	18.1633	1379.3	28.2811
9926	24041367C2.gr2.6		54360.3	171792	29.4009	810662	27572.7	0.121744	0.000536601	0.031667	4.46185	0.101508	0.265806	0.00606718	0.9813	76.5464	1981.95	7.82524	1723.9	18.6975	1519.48	30.8247
9927	24041367C2.gr2.7		49258.9	165763	26.1758	767121	29306.5	0.119678	0.000527544	0.0349466	4.48035	0.101929	0.271516	0.00619751	0.981297	79.2094	1951.42	7.85396	1727.34	18.7116	1548.49	31.3442
9930	24041367C2.gr3.1		31446.5	128547	340.768	630591	1850.5	0.115312	0.000508404	0.0547416	4.08552	0.0929485	0.256964	0.00586537	0.981289	77.9798	1884.76	7.91797	1651.42	18.3907	1474.29	30.0109
9931	24041367C2.gr3.2	traverse in a breccia	76090	90128.9	245.566	413723	1684.77	0.112952	0.000498973	0.0226236	4.29066	0.0976194	0.275504	0.0062886	0.981217	84.7954	1847.45	7.96908	1691.57	18.5644	1568.68	31.7046
9932	24041367C2.gr3.3	fragment without	71254.9	101813	220.64	441902	2002.82	0.115841	0.00051073	0.0241587	4.64195	0.10561	0.290627	0.00663379	0.98129	86.7634	1893	7.91005	1756.85	18.831	1644.66	33.0495
9933	24041367C2.gr3.4	gold bearing fractures	51894.1	132445	368.794	703432	1907.39	0.115751	0.000510332	0.033172	3.78962	0.0862164	0.23745	0.00541995	0.98129	72.4717	1891.6	7.91138	1590.55	18.115	1373.42	28.1732
9935	24041367C2.gr3.5		51913.9	116886	415.184	800899	1929.02	0.116031	0.000511559	0.0331593	2.94394	0.0669773	0.184016	0.00420026	0.98129	57.326	1895.95	7.90716	1393.29	17.0988	1088.87	22.828
9934	24041367C2.gr3.6		45803.9	86000.1	292.207	435898	1491.74	0.111224	0.00049141	0.0375825	3.83091	0.0871602	0.249805	0.00570203	0.981211	78.8183	1819.52	7.99734	1599.26	18.1564	1437.47	29.3438
9936	24041367C2.gr4.1	breccia fragment,	29751.5	139957	1506.16	850778	564.867	0.113276	0.000499483	0.0578603	3.24384	0.0737993	0.207692	0.00474074	0.981285	65.44	1852.62	7.94951	1467.7	17.5055	1216.51	25.2556
9937	24041367C2.gr4.2	traverse between	57271.8	164341	648.631	837413	1291.05	0.117085	0.000516181	0.0300572	3.99144	0.0908065	0.247244	0.0056435	0.981292	74.3602	1912.2	7.89145	1632.46	18.3063	1424.25	29.1028
9938	24041367C2.gr4.3	gold bearing	66703.4	167597	577.516	823624	1426.15	0.116598	0.000514048	0.0258072	4.1243	0.0938292	0.256541	0.00585571	0.981291	77.1783	1904.72	7.89869	1659.13	18.4241	1472.12	29.9717
9939	24041367C2.gr4.4	fractures	50639.5	164858	570.257	799766	1402.47	0.117325	0.00051723	0.0339938	4.20031	0.0955585	0.259651	0.00592671	0.981292	77.5273	1915.87	7.88791	1674.08	18.4889	1488.06	30.2595

## Sheet: Sample 24041374
No.	Analytical spot	Notes	206Pb/204Pb	Pb ppm	Th ppm	U ppm	U/Th	207Pb/206Pb	1s	206Pbc (%)	207Pb/235U	1s	206Pb/238U	1s	r	Concordance %	207Pb/206Pb age Ma	1s	207Pb/235U age Ma	1s	206Pb/238U age Ma	1s
9789	24041374C1.11		104614	169555	1670.24	655796	392.635	0.125323	0.000876958	0.016455	5.26138	0.114296	0.304486	0.00705709	0.953471	84.2064	2033.36	12.3308	1862.62	18.3678	1713.52	34.7802
9790	24041374C1.12		113667	184244	1012.27	788834	779.273	0.120442	0.000842877	0.0151445	4.59758	0.0998756	0.276853	0.0064166	0.953462	80.2066	1962.78	12.433	1748.83	17.9574	1575.49	32.3142
9791	24041374C1.13		101868	183318	1470.14	819840	557.661	0.122769	0.000859124	0.0168986	4.48425	0.0974135	0.264911	0.00613982	0.953466	75.8033	1996.85	12.3833	1728.06	17.8773	1514.92	31.2149
9793	24041374C1.15		104221	153167	1271.92	610661	480.11	0.121232	0.000848389	0.0165171	4.99	0.108402	0.298526	0.00691897	0.953464	85.2199	1974.43	12.4159	1817.63	18.2112	1684	34.2574
9794	24041374C1.16	breccia fragments	92868.6	167022	255.827	666723	2606.15	0.118606	0.000830052	0.0185362	4.89849	0.106413	0.299541	0.00694247	0.953459	87.1884	1935.32	12.4736	1802	18.155	1689.03	34.3467
9795	24041374C1.17	coated by pyrobitumen,	100355	148389	436.599	580883	1330.47	0.122617	0.000858063	0.0171534	5.1545	0.111976	0.304884	0.00706631	0.953466	85.9325	1994.65	12.3865	1845.14	18.3079	1715.48	34.8149
9796	24041374C1.18	gold in fractures	114956	136511	1087.34	565278	519.873	0.122414	0.000856644	0.0149747	4.87233	0.105847	0.288672	0.00669057	0.953466	82.0251	1991.7	12.3908	1797.48	18.1389	1634.89	33.3821
9797	24041374C2.19		86315	197703	1168.6	866714	741.671	0.124916	0.000874115	0.0199436	4.69463	0.101983	0.272572	0.00631739	0.95347	76.564	2027.61	12.339	1766.28	18.0233	1553.85	31.9226
9798	24041374C2.20		86914.4	179913	687.329	836426	1216.92	0.117355	0.000821323	0.019806	4.19482	0.0911268	0.259244	0.00600849	0.953457	77.4593	1916.34	12.5019	1673.01	17.6573	1485.97	30.686
9799	24041374C2.21		98360.8	188096	1303.31	886806	680.426	0.118794	0.000831366	0.0175012	4.18851	0.0909895	0.25572	0.00592682	0.953459	75.6677	1938.16	12.4694	1671.77	17.6522	1467.91	30.3546
9800	24041374C2.22		65765.8	179892	352.654	740162	2098.83	0.123447	0.00086386	0.0261751	4.97578	0.108092	0.292333	0.00677542	0.953468	82.2827	2006.64	12.3691	1815.21	18.2025	1653.18	33.7089
9801	24041374C2.23		96642.8	151943	809.826	662814	818.466	0.117321	0.000822297	0.0178123	4.05894	0.0881874	0.25092	0.00581571	0.953313	75.2594	1915.81	12.5211	1646.1	17.5476	1443.22	29.9009
9802	24041374C2.24		94895.2	210529	879.384	937402	1065.98	0.118779	0.000831261	0.0181403	4.45863	0.096857	0.272246	0.00630983	0.953459	80.0189	1937.93	12.4697	1723.31	17.8588	1552.19	31.8926
						13

## Sheet: Sample 23041346
No.	Analytical spot	Notes	206Pb/204Pb	Pb ppm	Th ppm	U ppm	U/Th	207Pb/206Pb	1s	206Pbc (%)	207Pb/235U	1s	206Pb/238U	1s	r	Concordance %	207Pb/206Pb age Ma	1s	207Pb/235U age Ma	1s	206Pb/238U age Ma	1s
9810	23041346A.C1.1		161065	134977	8289.77	654720	78.9793	0.109686	0.000767778	0.0106878	3.8676	0.084022	0.255735	0.00592723	0.95344	81.762	1794.2	12.6897	1606.95	17.3774	1467.99	30.3563
9814	23041346A.C1.5		210068	163410	7162.88	740482	103.378	0.110335	0.000772314	0.00819461	4.17719	0.0907461	0.27458	0.00636397	0.953442	86.606	1804.94	12.6728	1669.56	17.6435	1564.01	32.1068
9815	23041346A.C1.6	small round grains	161793	133147	6142.07	520824	84.7962	0.111426	0.000780505	0.0106397	4.50982	0.0979838	0.293542	0.00680359	0.953373	90.9643	1822.81	12.6541	1732.78	17.8984	1659.2	33.8171
9816	23041346A.C1.7	in pyrobitumen	167894	156502	8311.93	749841	90.2126	0.109509	0.000766546	0.0102531	3.93658	0.0855195	0.260716	0.00604266	0.95344	83.3215	1791.26	12.6943	1621.23	17.4395	1493.5	30.8241
9821	23041346A.C2.1	nodules	63535.3	56246.1	2448.6	278152	113.596	0.107246	0.000752068	0.0270941	3.78055	0.0821416	0.255667	0.00592572	0.953262	83.5594	1753.13	12.7774	1588.62	17.2986	1467.64	30.3502
9822	23041346A.C2.2		207465	193068	6170.72	936074	151.696	0.111275	0.000778871	0.00829743	3.99628	0.0868159	0.260471	0.00603697	0.953444	81.934	1820.34	12.6487	1633.44	17.4919	1492.25	30.8011
9825	23041346A.C2.4		163633	72802.3	2349.25	262516	111.745	0.111987	0.000784419	0.01052	5.40763	0.117488	0.350217	0.00811716	0.953375	105.593	1831.92	12.6399	1886.06	18.4491	1935.63	38.6382
9826	23041346A.C1.12		195301	129194	5376.86	513191	95.4443	0.10783	0.000754827	0.00881425	4.74998	0.103193	0.319484	0.00740475	0.953435	101.308	1763.07	12.7391	1776.1	18.0612	1787.21	36.0752
9827	23041346A.C1.13		178576	104045	5027.36	418058	83.1566	0.111154	0.000778607	0.00963976	4.83215	0.104981	0.315293	0.0073076	0.953371	97.0996	1818.37	12.6611	1790.51	18.1147	1766.7	35.7164
